# Supplementary material
Source: ML conference proceedings conference paper supplement (https://openreview.net/forum?id=Q3yLIIkt7z)

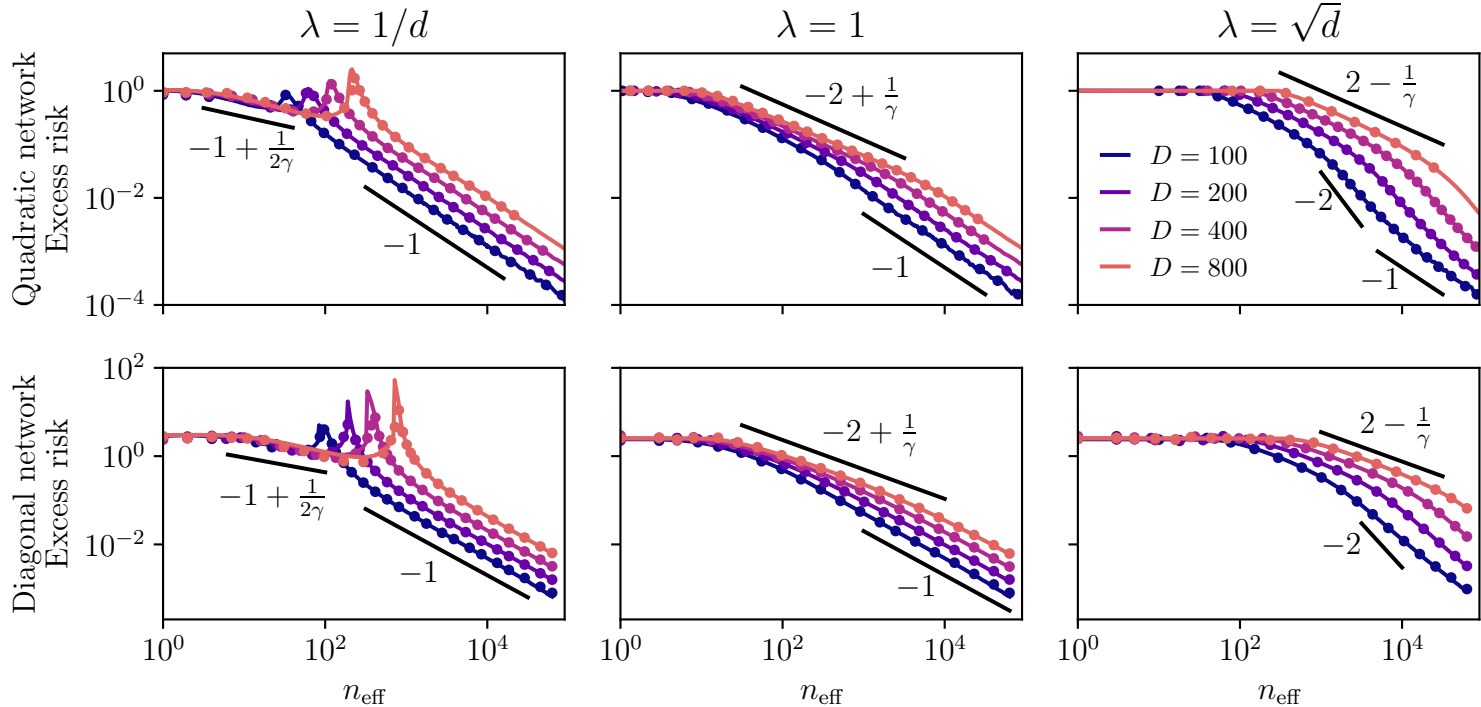

Supplement: supplementary_material [file rates.pdf › fig/rates.pdf]

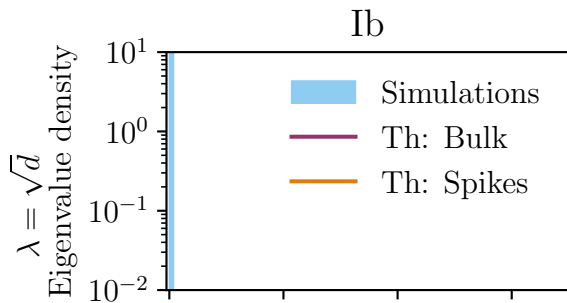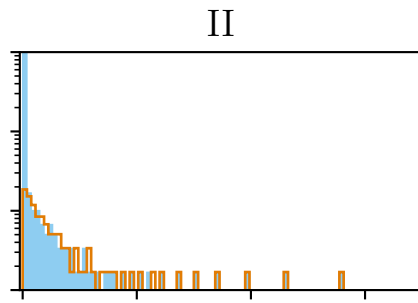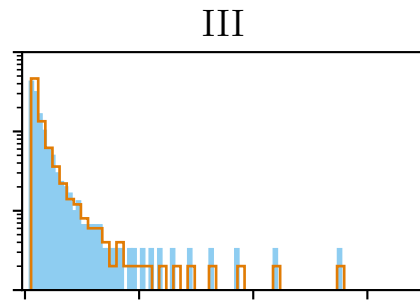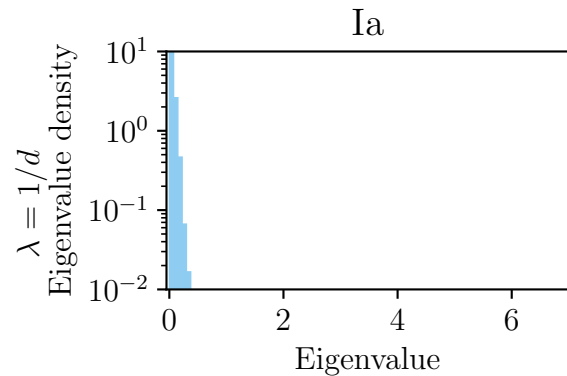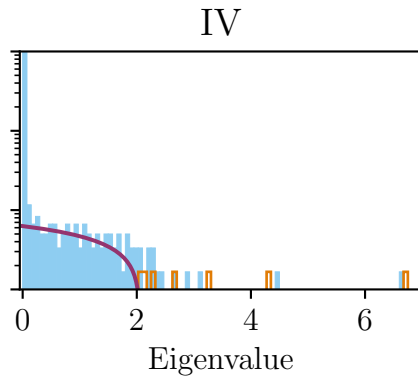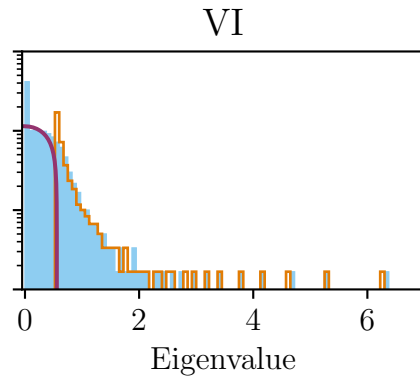

Supplement: supplementary_material [file spectra.pdf › fig/spectra.pdf]
